# Supplementary material for: Evidence of the Zanclean megaflood in the eastern Mediterranean Basin
Source: Springer Nature journal article supplement (doi:10.1038/s41598-018-19446-3), 2018-01-12
Supplement: MOESM1 [file 41598_2018_19446_MOESM1_ESM.pdf]

Supplementary Information for:

**Evidence of the Zanclean megaflood in the eastern Mediterranean Basin**

Aaron Micallef<sup>1\*</sup>, Angelo Camerlenghi<sup>2</sup>, Daniel Garcia-Castellanos<sup>3</sup>, Daniel Cunarro  
Otero<sup>1</sup>, Marc-André Gutscher<sup>4</sup>, Giovanni Barreca<sup>5</sup>, Daniele Spatola<sup>1</sup>, Lorenzo Facchin<sup>2</sup>,  
Riccardo Geletti<sup>2</sup>, Sebastian Krastel<sup>6</sup>, Felix Gross<sup>6</sup>, Morelia Urlaub<sup>7</sup>

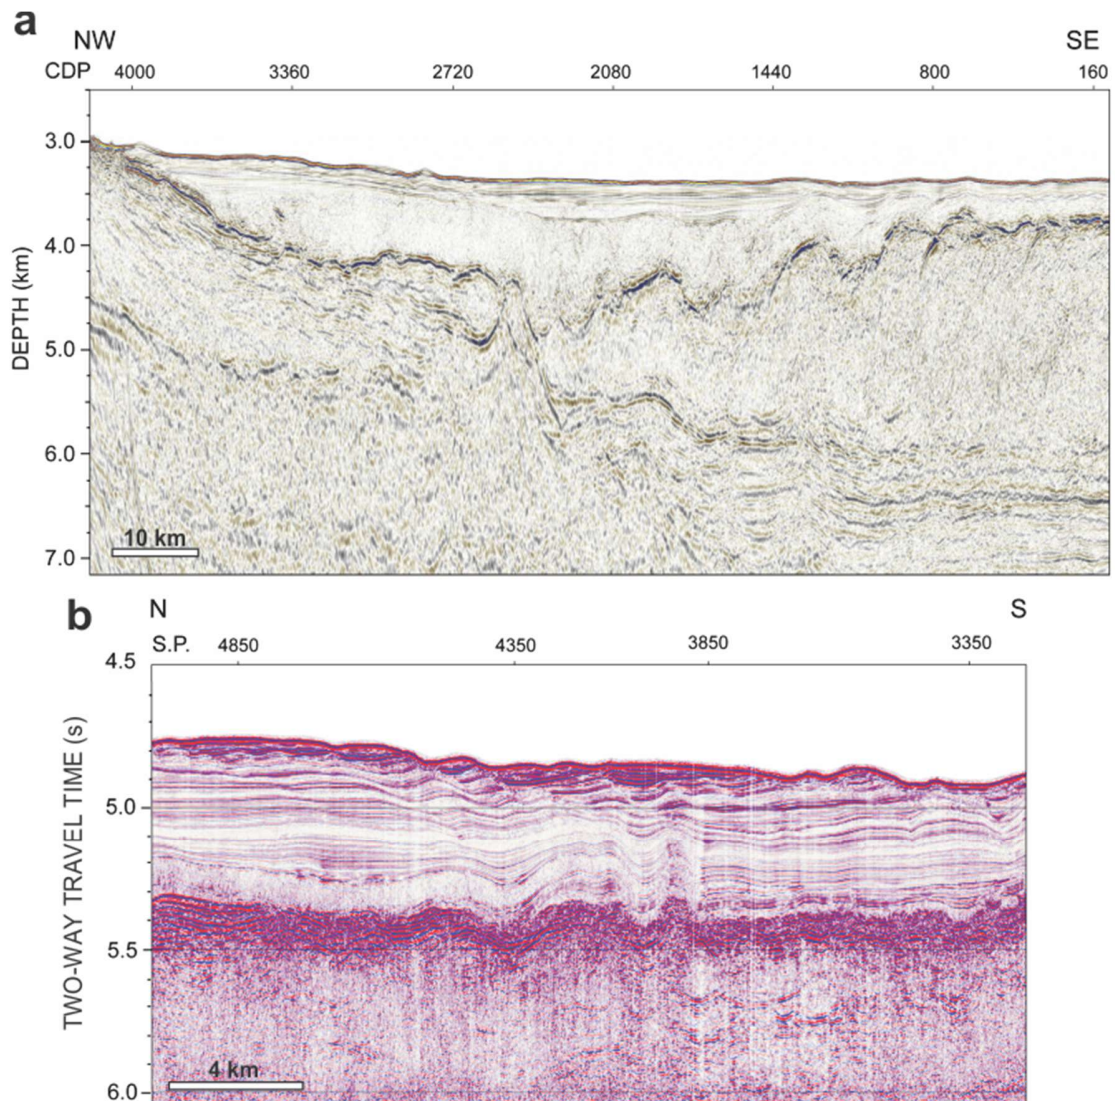

**Supplementary Fig. S1: Seismic reflection profiles from western Ionian Basin.**

Uninterpreted (a) PSDM seismic reflection profile CROP 21 and (b) post-stack time-migrated seismic reflection profile CUMECS-3. Location of profiles in Fig. 2a. CDP = common depth point; SP = shot point.

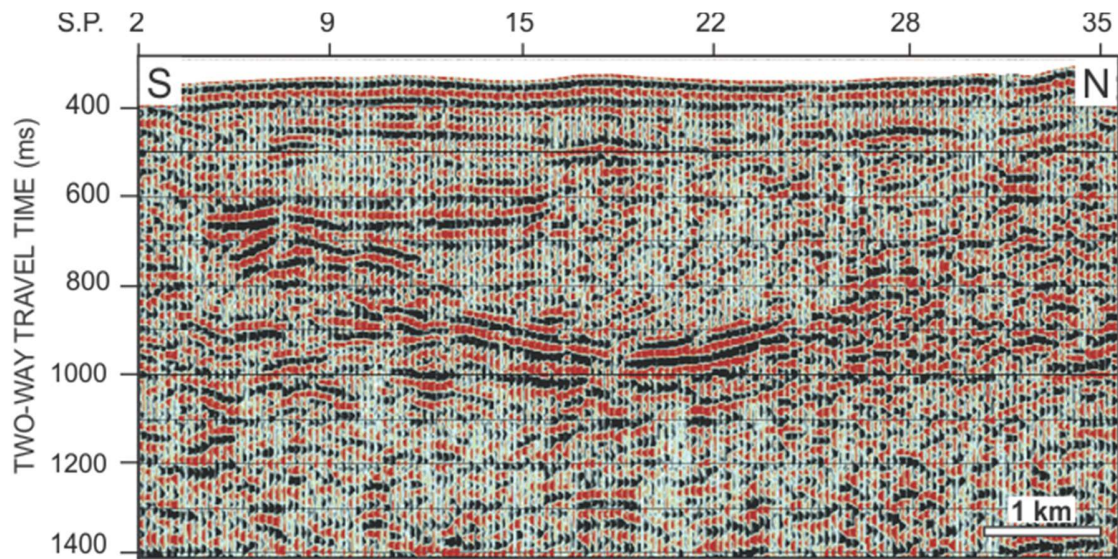

**Supplementary Fig. S2: Seismic reflection profile upslope of Noto Canyon.**

Uninterpreted seismic reflection profile C-578. Location of profile in Fig. 3a. SP = shot point.

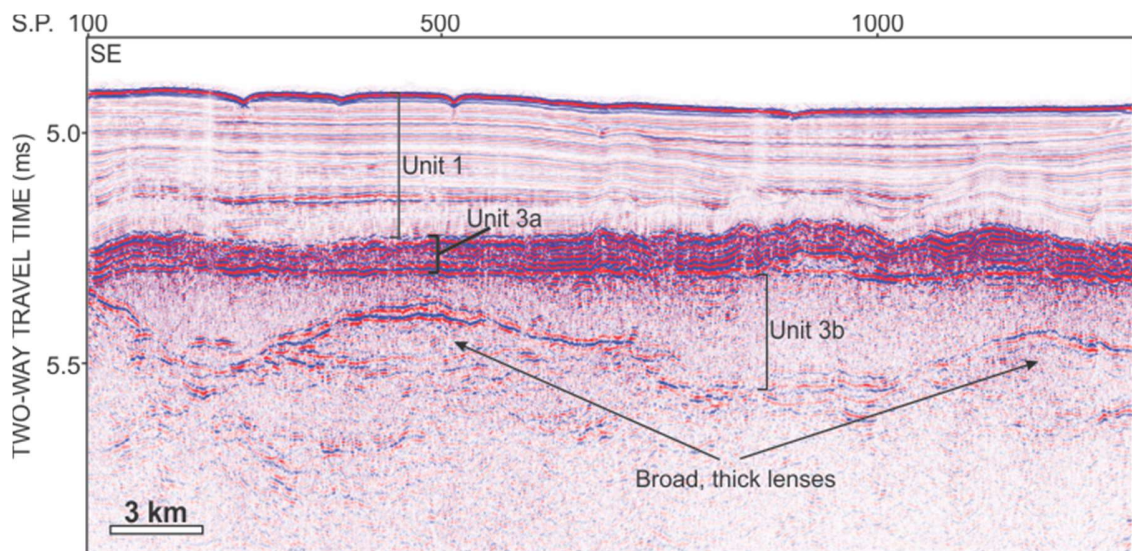

**Supplementary Fig. S3: Seismic reflection profile from the southern part of western Ionian Basin.** Interpreted seismic reflection profile CUMECS-3 showing broad, thick lenses underneath unit 3b (halite). The salt deposition clearly seals a pre-existing seabed topography controlled by sediment mass transport and deposition. Location of profile in Fig. 3e. Interpretation based on DSDP Site 374. SP = shot point.



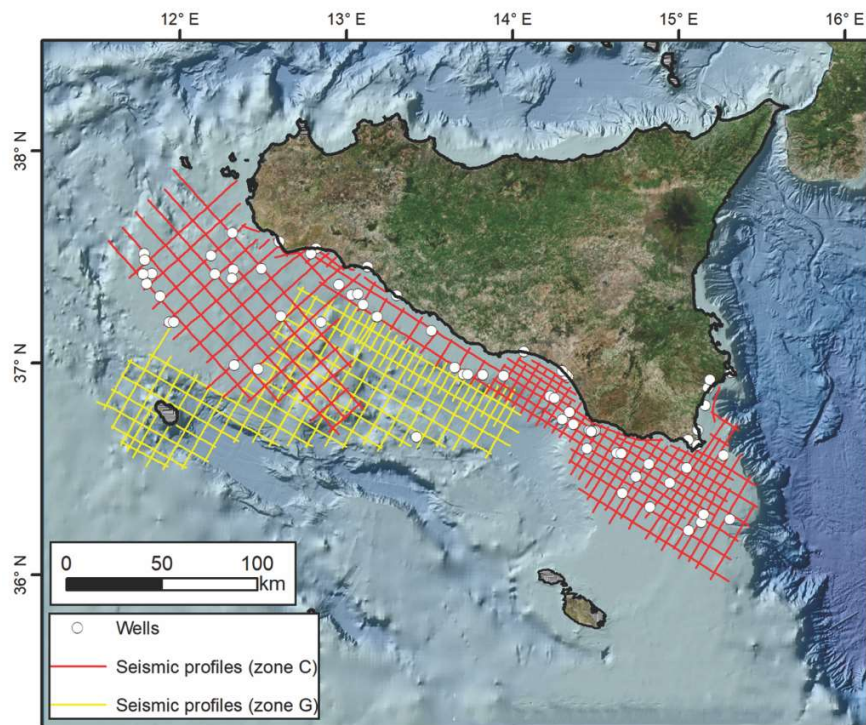

**Supplementary Fig. S4: Spatial coverage of seismic reflection profiles and wells from VIDEPI (<http://unmig.sviluppoeconomico.gov.it/videpi/>; VIDEPI 2009-2017; Ministero dello sviluppo economico DGRME, Società Geologica Italiana, Assomineraria; Creative commons license 3.0: <https://creativecommons.org/licenses/by/3.0/>). No changes have been made to the original data. Map generated with ArcMap 10.2 (<http://www.esri.com/arcgis/>). Background data from EMODnet bathymetry ([www.emodnet-bathymetry.eu/](http://www.emodnet-bathymetry.eu/)) and a compilation of data from ESRI, DigitalGlobe, GeoEye, Earthstar Geographics, CNES Airbus DS, USDA, USGS, AeroGRID, and IGN.**

**Supplementary Table S1: Stratigraphy of the western Ionian Basin.** Age, seismic markers and lithology of interpreted units from seismic reflection profiles.

| Units   | Age                                                                | MSC seismic marker; Depositional units <sup>12</sup> | Lithology after DSDP Site 374                                                                                                                          | Lithology after <sup>12</sup> assuming similar composition to Western Mediterranean units |
|---------|--------------------------------------------------------------------|------------------------------------------------------|--------------------------------------------------------------------------------------------------------------------------------------------------------|-------------------------------------------------------------------------------------------|
| Unit 1  | Quaternary and Pliocene                                            | P-Q                                                  | From top down:<br>Nannofossil marl with graded unit of foraminiferal quartzose sand to silt;<br>Nannofossil marl and mud;<br>Nannofossil marl and ooze | -                                                                                         |
|         |                                                                    |                                                      | Lower Pliocene: Dolomite                                                                                                                               | Lower Pliocene: Biogenic ooze                                                             |
| Unit 2  | Miocene-Pliocene transition (Eastern Mediterranean Zanclean Flood) | Not defined elsewhere                                | Not present at drill site location                                                                                                                     | Not defined elsewhere                                                                     |
| Unit 3a | Messinian                                                          | Upper Unit (UU)                                      | Dolomitic mudstone with minor gypsum layers;<br>Gypsum/dolomitic mudstone cycles;<br>Anhydrite and salts                                               | Anhydrite layers interbedded with marls                                                   |
| Unit 3b |                                                                    | Mobile Unit (MU)                                     | not drilled                                                                                                                                            | Halite                                                                                    |
| Unit 3c |                                                                    | Lower Unit (LU)                                      | not drilled                                                                                                                                            | Reworked gypsum?<br>Turbidites?<br>Clastics?                                              |
